# Supplementary material
Source: PubMed Central journal article supplement (PMC3032060)
Supplement: mmc1.pdf [file mmc1.pdf]

## **Supplemental Data**

### **Evolutionary and Functional Analysis**

#### **of Celiac Risk Loci Reveals SH2B3**

#### **as a Protective Factor against Bacterial Infection**

Alexandra Zhernakova, Clara C. Elbers, Bart Ferwerda, Jihane Romanos, Gosia Trynka, Patrick C. Dubois, Carolien G.F. de Kovel, Lude Franke, Marije Oosting, Donatella Barisani, Maria Teresa Bardella, Finnish Celiac Disease Study Group, Katri Kaukinen, Kalle Kurppa, Markku Mäki, Leo A.B. Joosten, Paivi Saavalainen, David A. van Heel, Carlo Catassi, Mihai G. Netea, and Cisca Wijmenga

#### Figure S1

EHH plot of ancestral and derived haplotypes per population in *IL12A*, *IL18RAP* and *SH2B3* gene loci.

#### Table S1

Distribution of iHS values in European controls and in the Saharawi population.

#### Table S2

Estimation of the age of the selective sweep in European populations, with different EHH thresholds.

#### Full acknowledgments

**Figure S1**

EHH plot of derived (blue) and ancestral (red) haplotypes of

- a. rs17810546 SNP in *IL12A* locus (1 Mb left and right from rs17810546)
- b. rs917997 SNP in *IL18RAP* locus (500 kb left and right from rs917997)
- c. rs3184504 SNP in *SH2B3* locus (1.4 Mb left and right from rs3184504 are included).

**A.**

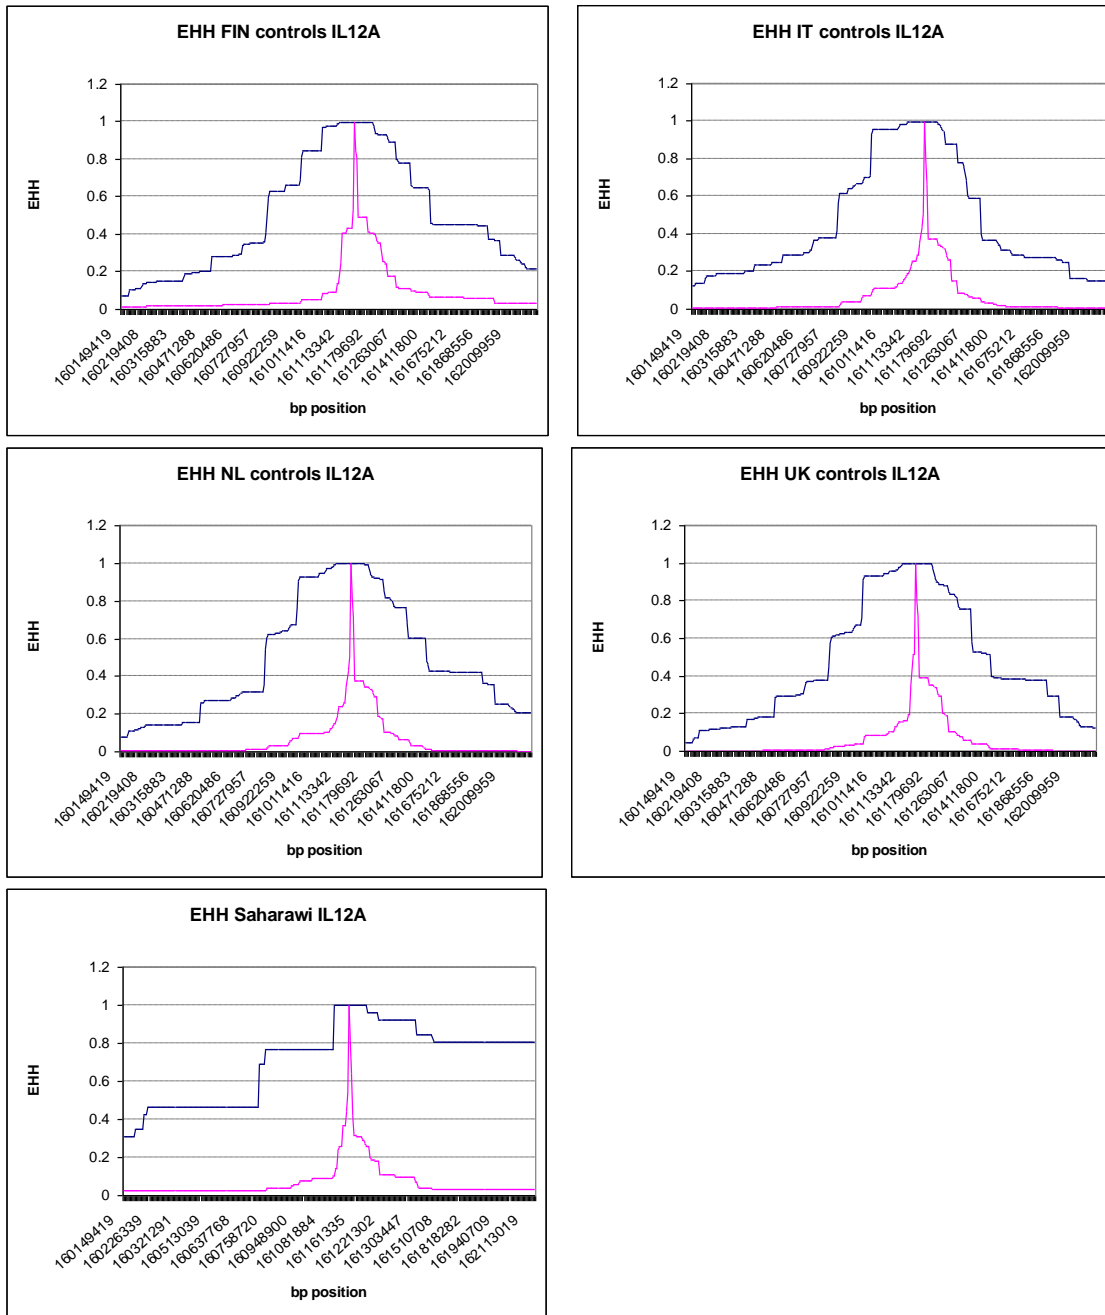

**B.**

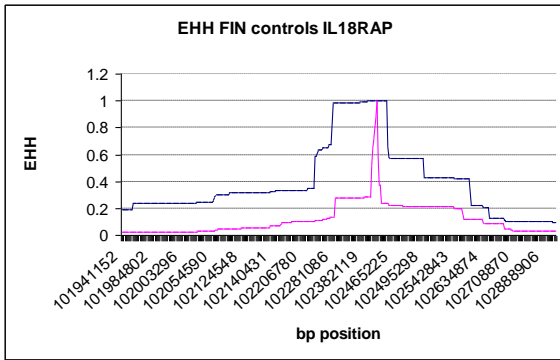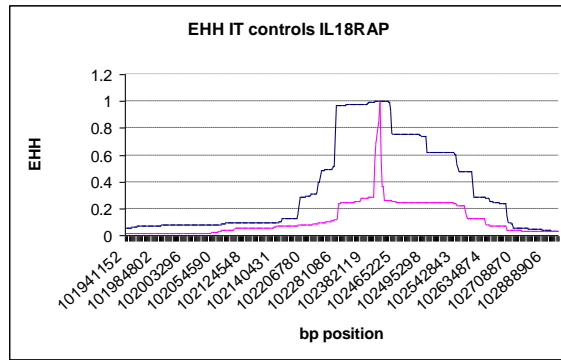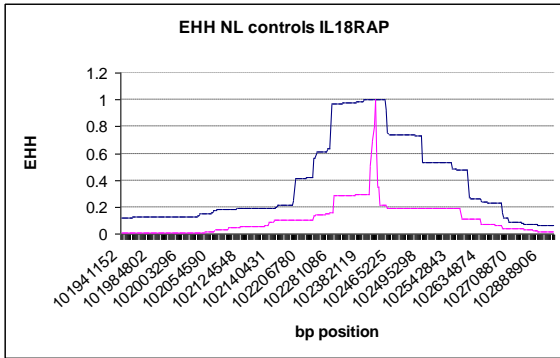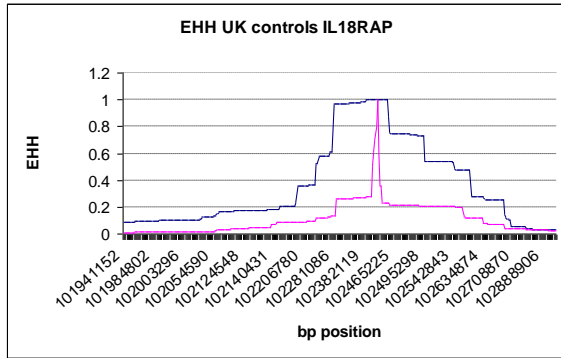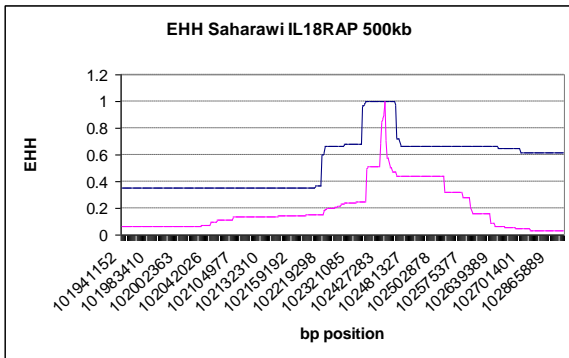

C.

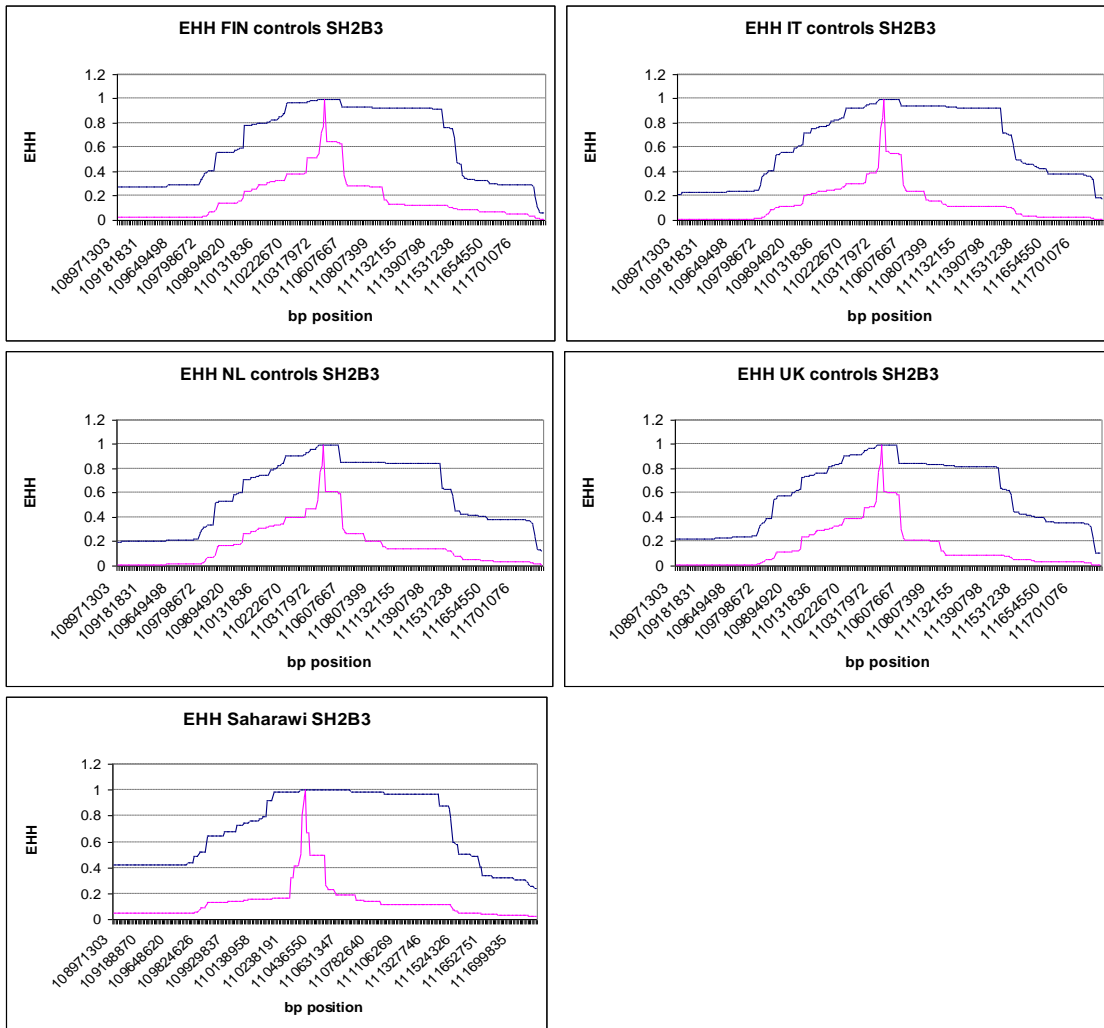

Populations: FIN – Finnish, IT – Italian, NL – Dutch, UK – United Kingdom

**Table S1**

Distribution of iHS values in European controls and in the Saharawi population

| <b>gene</b>     | <b>population</b> | <b>RS ID</b> | <b>N_ind</b> | <b>Allele<br/>Frq</b> | <b>IHSnoncorrected</b> | <b>IHScorrected</b> | <b>p value</b> |
|-----------------|-------------------|--------------|--------------|-----------------------|------------------------|---------------------|----------------|
| <i>CCR3</i>     | FIN controls      | rs6441961    | 1829         | 0.294                 | -0.688                 | 0.056               | 0.955          |
| <i>CCR3</i>     | IT controls       | rs6441961    | 543          | 0.324                 | 0.234                  | 1.562               | 0.118          |
| <i>CCR3</i>     | NL controls       | rs6441961    | 846          | 0.31                  | -0.789                 | -0.534              | 0.594          |
| <i>CCR3</i>     | Saharawi          | rs6441961    | 195          | 0.249                 | -1.221                 | -0.422              | 0.673          |
| <i>CCR3</i>     | UK3 controls      | rs6441961    | 4936         | 0.297                 | -0.939                 | -0.728              | 0.467          |
| <i>CCR3</i>     | HapMapCEU         | rs6441961    | 60           | 0.317                 |                        | -0.025              |                |
| <i>CCR3</i>     | HapMapYRI         | rs6441961    | 60           | 0.075                 |                        | 1.431               |                |
| <i>CCR3</i>     | HapMapAZN         | rs6441961    | 89           | 0.339                 |                        | -0.757              |                |
| <i>IL12A</i>    | FIN controls      | rs9811792    | 1829         | 0.475                 | -1.239                 | -1.595              | 0.111          |
| <i>IL12A</i>    | IT controls       | rs9811792    | 543          | 0.42                  | -1.159                 | -1.342              | 0.180          |
| <i>IL12A</i>    | NL controls       | rs9811792    | 846          | 0.444                 | -1.218                 | -1.424              | 0.154          |
| <i>IL12A</i>    | Saharawi          | rs9811792    | 195          | 0.344                 | -1.373                 | -1.174              | 0.240          |
| <i>IL12A</i>    | UK3 controls      | rs9811792    | 4936         | 0.46                  | -1.063                 | -1.157              | 0.247          |
| <i>IL12A</i>    | HapMapCEU         | rs9811792    | 60           | 0.525                 |                        | -0.937              |                |
| <i>IL12A</i>    | HapMapYRI         | rs9811792    | 60           | 0.3                   |                        | -0.556              |                |
| <i>IL12A</i>    | HapMapAZN         | rs9811792    | 89           | 0.61                  |                        | -2.187              |                |
| <i>IL12A</i>    | FIN controls      | rs17810546   | 1829         | 0.101                 | -2.792                 | -2.936              | 0.0033         |
| <i>IL12A</i>    | IT controls       | rs17810546   | 543          | 0.067                 | -2.729                 | -2.923              | 0.0035         |
| <i>IL12A</i>    | NL controls       | rs17810546   | 846          | 0.118                 | -2.874                 | -3.434              | 0.0006         |
| <i>IL12A</i>    | Saharawi          |              | 195          | 0.06                  | not calculated         |                     |                |
| <i>IL12A</i>    | UK3 controls      | rs17810546   | 4936         | 0.128                 | -2.811                 | -3.321              | 0.0009         |
| <i>IL12A</i>    | HapMapCEU         | rs17810546   | 60           | 0.1                   |                        | -2.492              |                |
| <i>IL12A</i>    | HapMapYRI         | rs17810546   | 60           | not present           |                        | n/a                 |                |
| <i>IL12A</i>    | HapMapAZN         | rs17810546   | 89           | not present           |                        | n/a                 |                |
| <i>IL18RAP</i>  | FIN controls      | rs917997     | 1829         | 0.192                 | -1.822                 | -1.383              | 0.167          |
| <i>IL18RAP</i>  | IT controls       | rs917997     | 543          | 0.23                  | -1.847                 | -2.036              | 0.042          |
| <i>IL18RAP</i>  | NL controls       | rs917997     | 846          | 0.216                 | -1.859                 | -1.911              | 0.056          |
| <i>IL18RAP</i>  | Saharawi          | rs917997     | 195          | 0.154                 | -2.562                 | -1.703              | 0.089          |
| <i>IL18RAP</i>  | UK3 controls      | rs917997     | 4936         | 0.238                 | -1.877                 | -2.036              | 0.042          |
| <i>IL18RAP</i>  | HapMapCEU         | rs917997     | 60           | 0.233                 |                        | -1.739              |                |
| <i>IL18RAP</i>  | HapMapYRI         | rs917997     | 60           | 0.067                 |                        | -0.450              |                |
| <i>IL18RAP</i>  | HapMapAZN         | rs917997     | 89           | 0.406                 |                        | -2.115              |                |
| <i>IL2_IL21</i> | FIN controls      | rs13151961   | 1829         | 0.115                 | -1.167                 | -0.334              | 0.738          |
| <i>IL2_IL21</i> | IT controls       | rs13151961   | 543          | 0.12                  | -1.046                 | -0.483              | 0.629          |
| <i>IL2_IL21</i> | NL controls       | rs13151961   | 846          | 0.194                 | -1.164                 | -0.516              | 0.606          |
| <i>IL2_IL21</i> | Saharawi          |              | 195          | 0.02                  | not calculated         |                     |                |
| <i>IL2_IL21</i> | UK3 controls      | rs13151961   | 4936         | 0.167                 | -1.182                 | -0.521              | 0.603          |
| <i>IL2_IL21</i> | HapMapCEU         | rs13151961   | 60           | 0.192                 |                        | -1.976              |                |
| <i>IL2_IL21</i> | HapMapYRI         | rs13151961   | 60           | 0.017                 |                        | not calculated      |                |
| <i>IL2_IL21</i> | HapMapAZN         | rs13151961   | 89           | not present           |                        | n/a                 |                |
| <i>LPP</i>      | FIN controls      | rs1464510    | 1829         | 0.547                 | 0.265                  | 0.416               | 0.677          |
| <i>LPP</i>      | IT controls       | rs1464510    | 543          | 0.471                 | 0.186                  | 0.722               | 0.470          |
| <i>LPP</i>      | NL controls       | rs1464510    | 846          | 0.493                 | 0.112                  | 0.560               | 0.576          |

|                |              |           |      |             |        |                |       |
|----------------|--------------|-----------|------|-------------|--------|----------------|-------|
| <i>LPP</i>     | Saharawi     | rs1464510 | 195  | 0.313       | 0.079  | 1.104          | 0.270 |
| <i>LPP</i>     | UK3 controls | rs1464510 | 4936 | 0.435       | 0.099  | 0.668          | 0.504 |
| <i>LPP</i>     | HapMapCEU    | rs1464510 | 60   | 0.425       |        | -0.673         |       |
| <i>LPP</i>     | HapMapYRI    | rs1464510 | 60   | 0.183       |        | -0.629         |       |
| <i>LPP</i>     | HapMapAZN    | rs1464510 | 89   | 0.511       |        | 0.794          |       |
| <i>REL</i>     | FIN controls | rs842647  | 1829 | 0.323       | -0.989 | -0.852         | 0.394 |
| <i>REL</i>     | IT controls  | rs842647  | 543  | 0.263       | -1.065 | -0.764         | 0.445 |
| <i>REL</i>     | NL controls  | rs842647  | 846  | 0.346       | -1.152 | -1.100         | 0.271 |
| <i>REL</i>     | Saharawi     | rs842647  | 195  | 0.136       | -1.685 | -0.512         | 0.608 |
| <i>REL</i>     | UK3 controls | rs842647  | 4936 | 0.348       | -1.122 | -1.022         | 0.307 |
| <i>REL</i>     | HapMapCEU    | rs842647  | 60   | 0.3         |        | -0.516         |       |
| <i>REL</i>     | HapMapYRI    | rs842647  | 60   | 0.475       |        | -1.793         |       |
| <i>REL</i>     | HapMapAZN    | rs842647  | 89   | 0.828       |        | -0.279         |       |
| <i>RGS1</i>    | FIN controls | rs2816316 | 1829 | 0.857       | 0.701  | -0.110         | 0.912 |
| <i>RGS1</i>    | IT controls  | rs2816316 | 543  | 0.831       | 0.752  | 0.184          | 0.854 |
| <i>RGS1</i>    | NL controls  | rs2816316 | 846  | 0.711       | -0.081 | -0.756         | 0.450 |
| <i>RGS1</i>    | Saharawi     | rs2816316 | 195  | 0.756       | 0.657  | 0.106          | 0.915 |
| <i>RGS1</i>    | UK3 controls | rs2816316 | 4936 | 0.822       | 0.754  | 0.042          | 0.966 |
| <i>RGS1</i>    | HapMapCEU    | rs2816316 | 60   | 0.783       |        | 0.695          |       |
| <i>RGS1</i>    | HapMapYRI    | rs2816316 | 60   | 0.733       |        | -0.334         |       |
| <i>RGS1</i>    | HapMapAZN    | rs2816316 | 89   | 0.767       |        | 1.039          |       |
| <i>SH2B3</i>   | FIN controls | rs3184504 | 1829 | 0.398       | -1.766 | -2.129         | 0.033 |
| <i>SH2B3</i>   | IT controls  | rs3184504 | 543  | 0.494       | -1.977 | -2.597         | 0.009 |
| <i>SH2B3</i>   | NL controls  | rs3184504 | 846  | 0.465       | -1.680 | -2.114         | 0.035 |
| <i>SH2B3</i>   | Saharawi     | rs3184504 | 195  | 0.151       | -2.209 | -1.224         | 0.221 |
| <i>SH2B3</i>   | UK3 controls | rs3184504 | 4936 | 0.468       | -1.736 | -2.214         | 0.027 |
| <i>SH2B3</i>   | HapMapCEU    | rs3184504 | 60   | 0.408       |        | -2.756         |       |
| <i>SH2B3</i>   | HapMapYRI    | rs3184504 | 60   | not present |        | n/a            |       |
| <i>SH2B3</i>   | HapMapAZN    | rs3184504 | 89   | not present |        | n/a            |       |
| <i>TAGAP</i>   | FIN controls | rs1738074 | 1829 | 0.58        | -1.150 | -1.673         | 0.094 |
| <i>TAGAP</i>   | IT controls  | rs1738074 | 543  | 0.587       | -1.029 | -1.450         | 0.147 |
| <i>TAGAP</i>   | NL controls  | rs1738074 | 846  | 0.605       | -1.042 | -2.059         | 0.039 |
| <i>TAGAP</i>   | Saharawi     | rs1738074 | 195  | 0.531       | -1.141 | -1.425         | 0.154 |
| <i>TAGAP</i>   | UK3 controls | rs1738074 | 4936 | 0.577       | -1.056 | -1.499         | 0.134 |
| <i>TAGAP</i>   | HapMapCEU    | rs1738074 | 60   | 0.508       |        | -1.287         |       |
| <i>TAGAP</i>   | HapMapYRI    | rs1738074 | 60   | 0.283       |        | -1.275         |       |
| <i>TAGAP</i>   | HapMapAZN    | rs1738074 | 89   | 0.339       |        | 0.637          |       |
| <i>TNFAIP3</i> | FIN controls | rs2327832 | 1829 | 0.185       | -1.420 | -0.740         | 0.460 |
| <i>TNFAIP3</i> | IT controls  | rs2327832 | 543  | 0.157       | -1.475 | -1.220         | 0.222 |
| <i>TNFAIP3</i> | NL controls  | rs2327832 | 846  | 0.205       | -1.566 | -1.430         | 0.153 |
| <i>TNFAIP3</i> | Saharawi     | rs2327832 | 195  | 0.249       | -1.354 | -0.616         | 0.538 |
| <i>TNFAIP3</i> | UK3 controls | rs2327832 | 4936 | 0.23        | -1.584 | -1.531         | 0.126 |
| <i>TNFAIP3</i> | HapMapCEU    | rs2327832 | 60   | 0.175       |        | -1.491         |       |
| <i>TNFAIP3</i> | HapMapYRI    | rs2327832 | 60   | 0.108       |        | -0.544         |       |
| <i>TNFAIP3</i> | HapMapAZN    | rs2327832 | 89   | 0.006       |        | not calculated |       |

**Table S2**

Estimation of the age of the selective sweep in European populations, with different EHH

thresholds

*A. IL12A*

| <b>threshold EHH</b> | <b>0.25</b> | <b>0.3</b> | <b>0.35</b> |
|----------------------|-------------|------------|-------------|
| FIN controls         | 2248        | 2303       | 2054        |
| IT controls          | 2479        | 3381       | 3446        |
| NL controls          | 2231        | 2297       | 2182        |
| UK controls          | 2423        | 2410       | 2107        |

*B. IL18RAP*

| <b>threshold EHH</b> | <b>0.25</b> | <b>0.3</b> | <b>0.35</b> |
|----------------------|-------------|------------|-------------|
| FIN controls         | 6282        | 5560       | 6822        |
| IT controls          | 7481        | 7700       | 6822        |
| NL controls          | 7606        | 7111       | 6200        |
| UK controls          | 7136        | 7111       | 6200        |

*C. SH2B3*

| <b>threshold EHH</b> | <b>0.25</b> | <b>0.3</b> | <b>0.35</b> |
|----------------------|-------------|------------|-------------|
| FIN controls         | 1248        | 1608       | 1502        |
| IT controls          | 1727        | 1525       | 1339        |
| NL controls          | 1756        | 1541       | 1374        |
| UK controls          | 1756        | 1525       | 1370        |

## **Full acknowledgments**

This study was supported by the Celiac Disease Consortium, an Innovative Cluster approved by: the Netherlands Genomics Initiative and partially funded by the Dutch Government (BSIK03009), the Netherlands Organization for Scientific Research (NWO, VICI grant 918.66.620 to CW), EU STREP KP6 (grant 036383), SenterNovem (IOP genomics IGE05012), and the Wellcome Trust (grant WT084743MA to DAvH). We acknowledge use of DNA from the British 1958 Birth Cohort collection, funded by the UK Medical Research Council (grant G0000934) and the Wellcome Trust (grant 068545/Z/02). GT was awarded a Ter Meulen Fund travel grant by the Royal Netherlands Academy of Arts and Sciences (KNAW). MGN was supported by a VIDI grant from the Netherlands Organization for Scientific Research (NWO). PCD is an MRC Clinical Training Fellow (G0700545). We thank all the clinicians and Coeliac UK for their help in recruiting individuals for this study. The Finnish Celiac Disease Study Group is represented by Katri Kaukinen, Kalle Kurppa, and Markku Mäki. We thank C.J.J. Mulder, M.L. Mearin, J. Sweizer, W.H.M. Verbeek, G.J. Tack, V.M. Wolters, and R.H.J. Houwen for collecting Dutch samples and F. Cucca, S. Teresi, G. Iacono, R. Francavilla, S. Castellaneta, M.D. Cantarero and A. Ravelli for collecting the Saharawi families. We thank P. Deloukas, R. Gwilliam and the Wellcome Trust Sanger Institute for genotyping the UK controls. We thank K. Hunt, V. Mistry and G. Heap for sample preparation and A. Curtotti and C. Mein for assistance with genotyping. This study used data generated by the Wellcome Trust Case-Control Consortium 2. A full list of the investigators who contributed to generating the data is available from [www.wtccc.org.uk](http://www.wtccc.org.uk). Funding for the project was provided by the Wellcome Trust under award 085475. This research utilized resources provided by the Type 1 Diabetes Genetics Consortium, a collaborative clinical study sponsored by the National Institute of Diabetes and Digestive and Kidney Diseases (NIDDK), National Institute of Allergy and Infectious Diseases (NIAID), National Human Genome Research Institute (NHGRI), National Institute of Child Health and Human Development (NICHD), and Juvenile Diabetes Research Foundation International (JDRF) and supported by U01 DK062418. We thank all the individuals who participated in the study, J. Senior for critically reading the manuscript, and F. Mulder, M. Charlaganov and M. Golov for help with the data analysis.
